# Supplementary material for: Genetic Background and Antibiotic Resistance Profiles of K. pneumoniae NDM-1 Strains Isolated from UTI, ABU, and the GI Tract, from One Hospital in Poland, in Relation to Strains Nationally and Worldwide
Source: MDPI journal article supplement (doi:10.3390/genes12081285), 2021-08-22
Supplement: s1 [file s1]

## Supplementary Materials

# Title Genetic background and antibiotic resistance profiles of *K. pneumoniae* NDM-1 strains isolated from UTI, ABU and the GI tract, from one hospital in Poland, in relation to strains nationally and worldwide

Magdalena Wysocka <sup>1</sup>, Roxana Zamudio <sup>2</sup>, Marco R. Oggioni <sup>2</sup>, Justyna Gołębiewska <sup>3</sup>, Marek Bronk <sup>4</sup> and Beata Krawczyk <sup>1,\*</sup>

<sup>1</sup> Department of Molecular Biotechnology and Microbiology, Faculty of Chemistry, Gdańsk University of Technology, ul. Narutowicza 11/12, 80-233 Gdańsk, Poland

<sup>2</sup> Department of Genetics and Genome Biology, University of Leicester, University Road, Leicester, LE1 7RH, UK

<sup>3</sup> Department of Nephrology, Transplantology and Internal Medicine, Medical University of Gdańsk, ul. Dębinki 7, 80-952 Gdańsk, Poland

<sup>4</sup> Laboratory of Clinical Microbiology, University Centre for Laboratory Diagnostics, Medical University of Gdańsk Clinical Centre, ul. Dębinki 7, 80-952 Gdańsk, Poland

\* Correspondence: beata.krawczyk@pg.edu.pl

**Citation:** Wysocka, M.; Zamudio, R.; Oggioni, M.R.; Gołębiewska, J.; Bronk, M. Title Genetic background and antibiotic resistance profiles of *K. pneumoniae* NDM-1 strains isolated from UTI, ABU and the GI tract, from one hospital in Poland, in relation to strains nationally and worldwide. *Genes* **2021**, *12*, 1285. <https://doi.org/10.3390/genes12081285>

Academic Editor(s): Taeok Bae

Received: 19 July 2021

Accepted: 20 August 2021

Published: 22 August 2021

**Publisher's Note:** MDPI stays neutral with regard to jurisdictional claims in published maps and institutional affiliations.

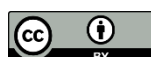

**Copyright:** © 2021 by the authors. Submitted for possible open access publication under the terms and conditions of the Creative Commons Attribution (CC BY) license (<http://creativecommons.org/licenses/by/4.0/>).

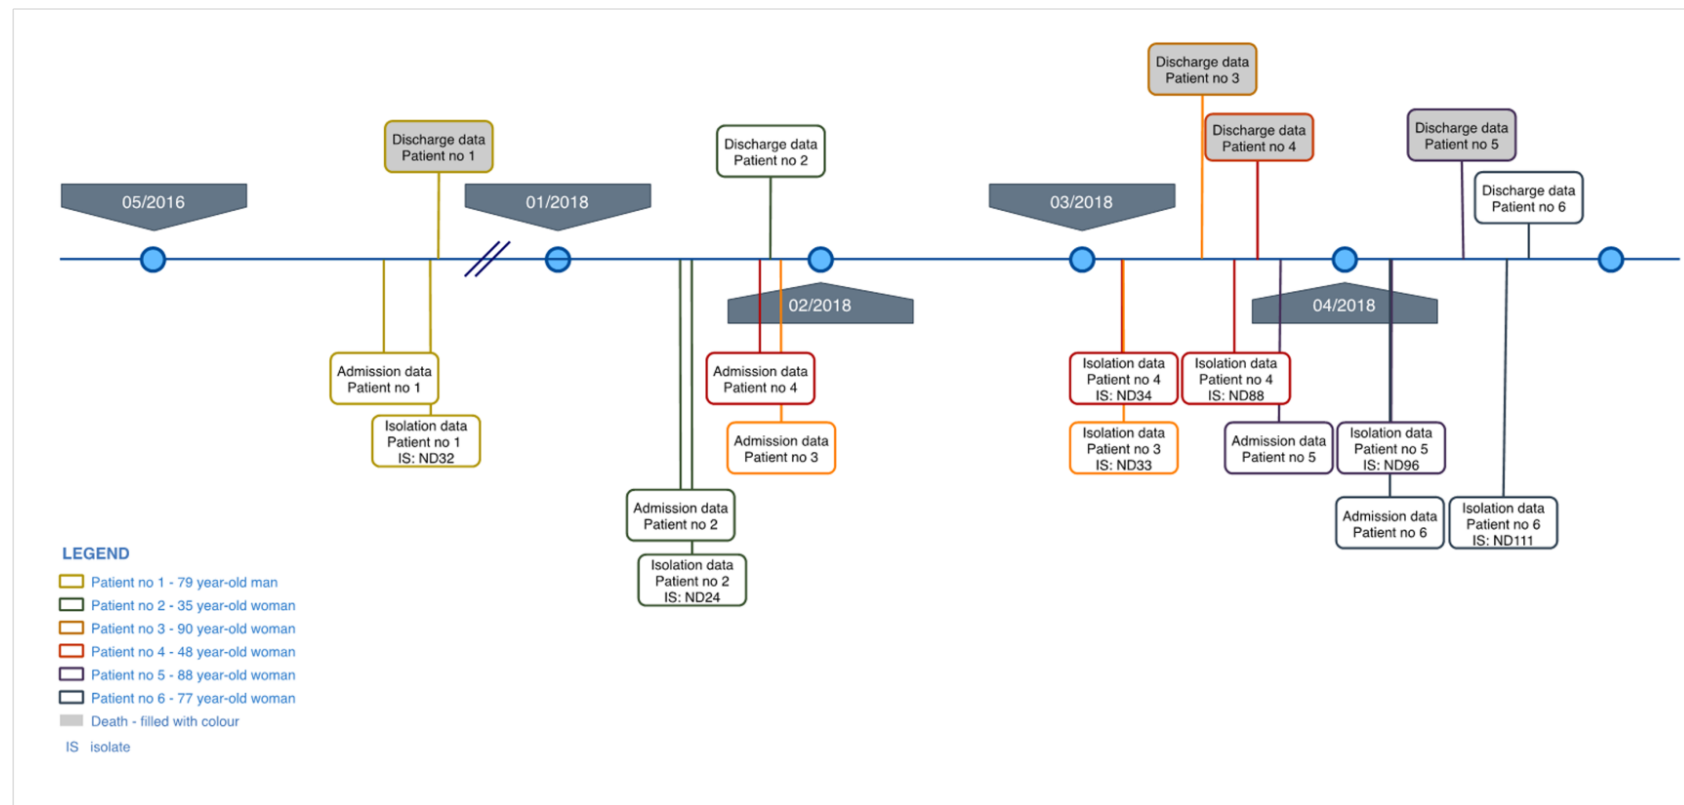

**Figure S1.** Timeline of events in the epidemiologically linked cases of New Delhi metallo- $\beta$ -lactamase 1-producing *Klebsiella pneumoniae*. Dates are given as month/year. Abbreviations: IS, isolate.

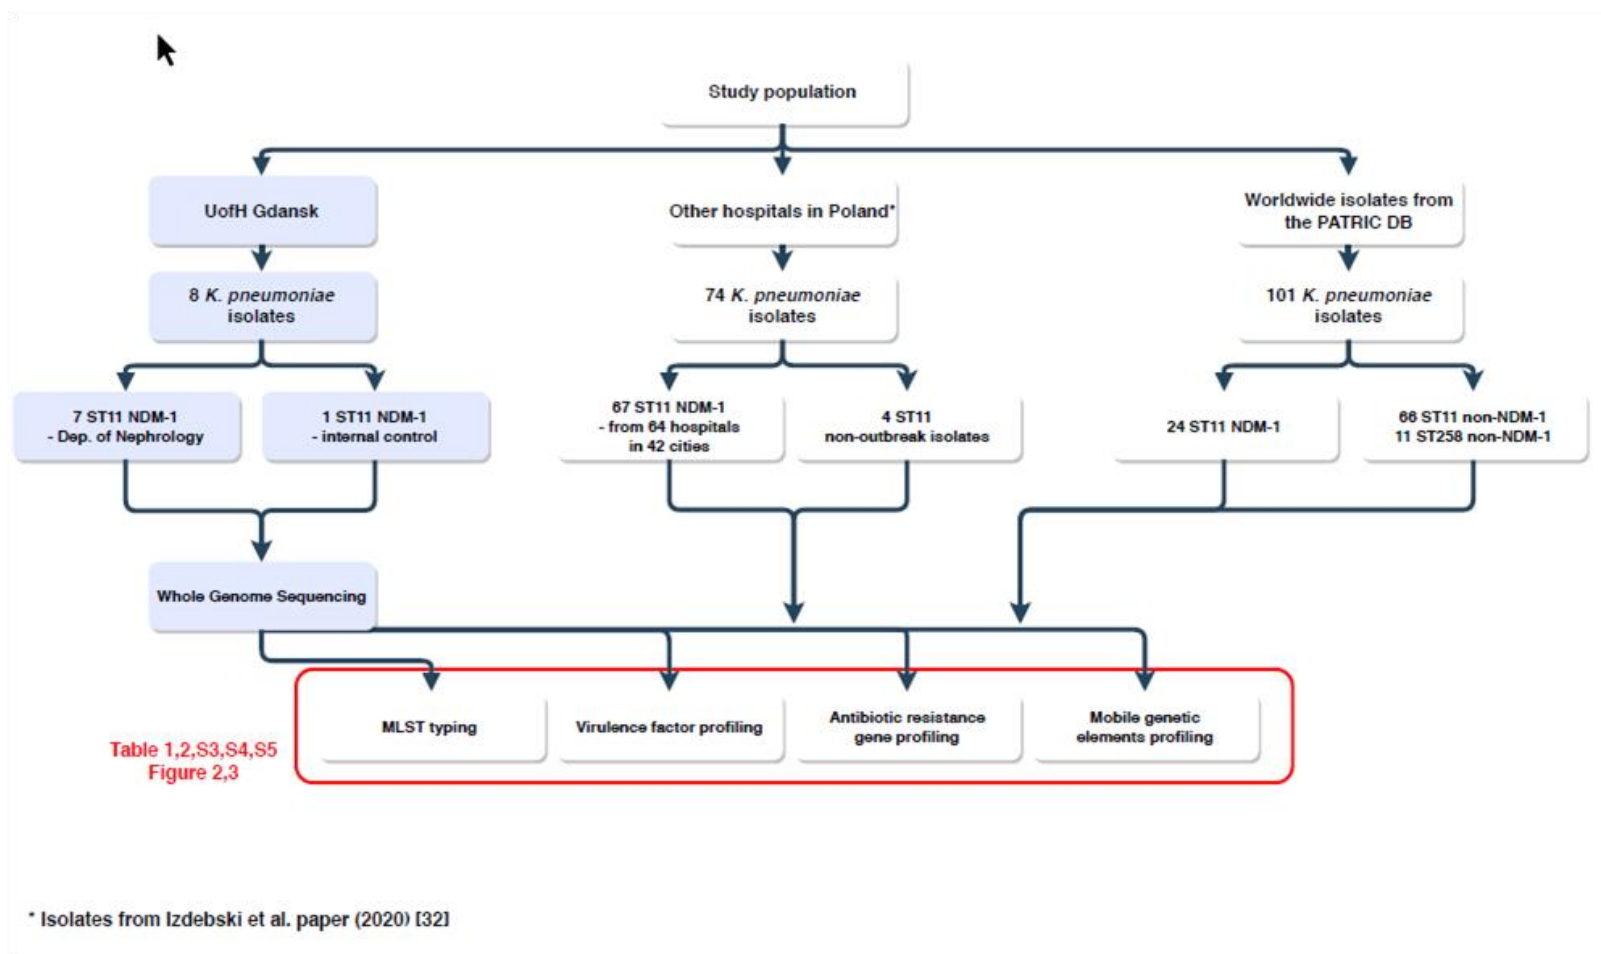

Figure S2. Diagram showing the groups of the analyzed strains in this work.

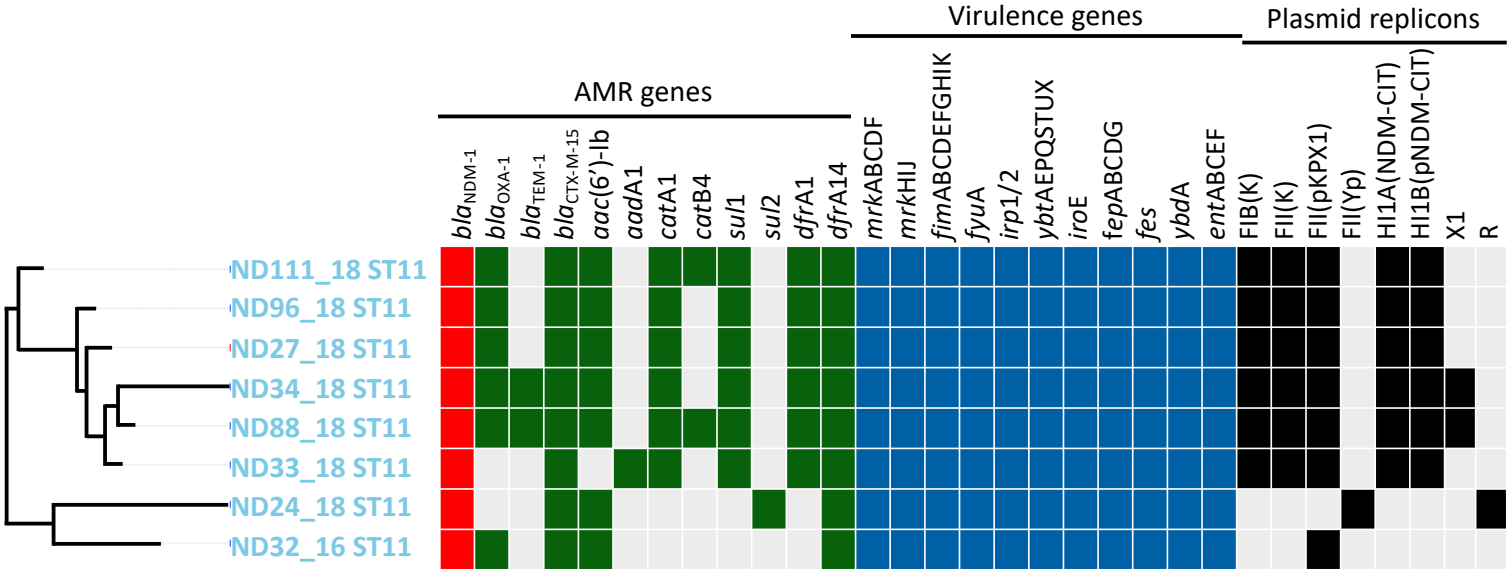

**Figure S3.** The core-gene phylogenetic tree for eight *K. pneumoniae* isolates from this study. The sequence type (ST) is indicated for each isolate, following the isolate name. In the heatmap the presence of the *bla*<sub>NDM-1</sub> gene is indicated by red (present) or gray (absent) and the presence/absence profile of the genotype for genes encoding antimicrobial resistance (green – present, gray – absent), genes encoding virulence determinants (blue – present, gray – absent) and plasmid replicons is indicated.

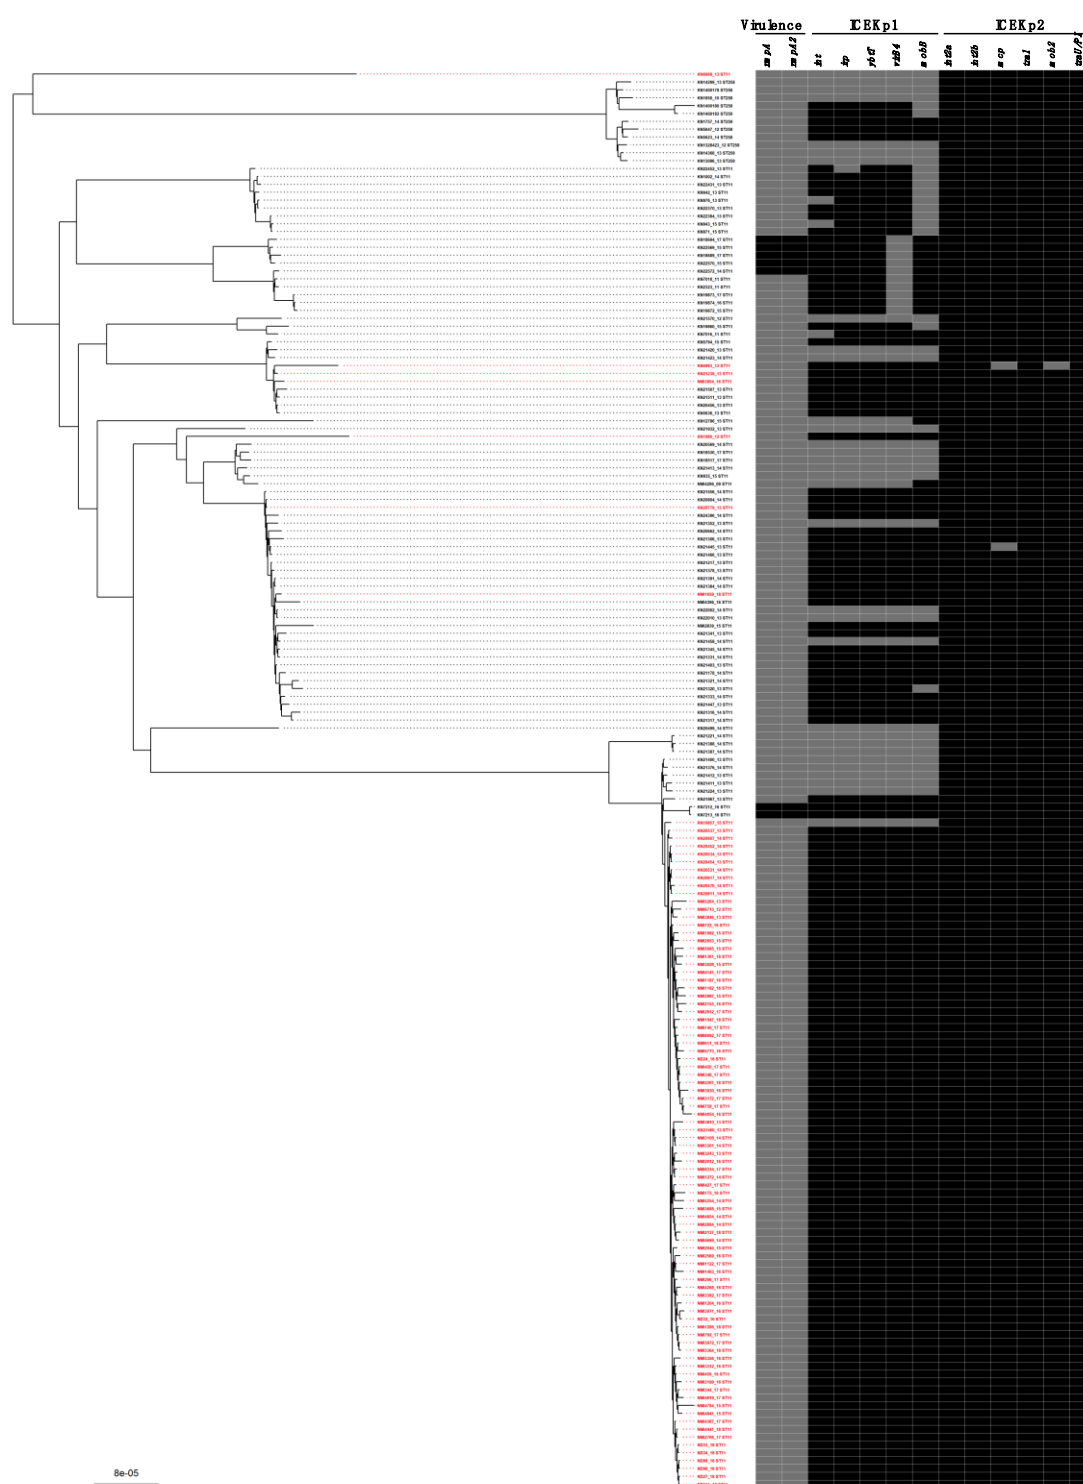

**Figure S4.** Occurrence of integrative conjugation elements (ICEKp1 and ICEKp2) in clinical isolates of *K. pneumoniae*. Genome core phylogenetic tree generated for 180 *K. pneumoniae* isolates. The color of the isolate corresponds to the presence or absence of the blaNDM-1 gene (red – present, black – absent). The sequence type (ST) is indicated for each isolate after the isolate name. The presence and coexistence of ICEKp1 and ICEKp2 (marker genes) is shown in the heatmap on the right (black – present, gray – absent). The virulence related genes *ompA* and *ompA2* were also included in the analysis to determine their correlation with the presence / absence of ICEKp1 and ICEKp2. The scale bar shown in the lower left corner shows the average number of substitutions per locus.

**Table S1. Strain metadata.** Characteristics of the single isolates, including collection details, genome assembly statistics, genomic features.

| As-<br>sem-<br>bly/Sa-<br>mple<br>Name | Bi-<br>osample<br>accession | Coun-<br>try | Hospi-<br>tal | Year | Mon-<br>th | Sour-<br>ce  | Graf-<br>t | Infection<br>Status | Age | Sex | ST | # con-<br>tigs | Largest<br>contig | Total<br>length | GC<br>(%) | N50    | N75    | L50 | L75 | # N's per<br>100 kbp | num_se-<br>qs | sum_<br>len | min_l<br>en | avg_le<br>n | max_l<br>en |
|----------------------------------------|-----------------------------|--------------|---------------|------|------------|--------------|------------|---------------------|-----|-----|----|----------------|-------------------|-----------------|-----------|--------|--------|-----|-----|----------------------|---------------|-------------|-------------|-------------|-------------|
| ND27                                   | SAMN17-<br>168596           | Po-<br>land  | Torun         | 2018 | 5          | urine        | 0          | infection           | ND  | ND  | 11 | 138            | 483179            | 5966290         | 56.84     | 239522 | 101300 | 9   | 18  | 0.00                 | 720,384       | 162,044,155 | 36          | 224.9       | 251         |
| ND96                                   | SAMN17-<br>168597           | Po-<br>land  | Gdansk        | 2018 | 4          | urine        | 0          | infection           | ND  | K   | 11 | 113            | 804016            | 5959156         | 56.81     | 239630 | 100790 | 9   | 17  | 0.00                 | 651,043       | 150,425,106 | 36          | 231.1       | 251         |
| ND88                                   | SAMN17-<br>168598           | Po-<br>land  | Gdansk        | 2018 | 3          | urine        | 1          | coloniza-<br>tion   | 47  | K   | 11 | 136            | 483261            | 6006090         | 56.72     | 239522 | 99546  | 10  | 20  | 0.00                 | 645,02        | 143,147,694 | 36          | 221.9       | 251         |
| ND32                                   | SAMN17-<br>168599           | Po-<br>land  | Gdansk        | 2016 | 5          | urine        | 0          | infection           | ND  | M   | 11 | 98             | 483251            | 5441546         | 57.37     | 203937 | 101300 | 9   | 17  | 0.00                 | 523,802       | 116,651,684 | 36          | 222.7       | 251         |
| ND111                                  | SAMN17-<br>168600           | Po-<br>land  | Gdansk        | 2018 | 4          | urine        | 0          | coloniza-<br>tion   | ND  | K   | 11 | 103            | 804016            | 5953882         | 56.82     | 241563 | 101300 | 8   | 17  | 0.00                 | 651,012       | 142,164,105 | 36          | 218.4       | 251         |
| ND24                                   | SAMN17-<br>168601           | Po-<br>land  | Gdansk        | 2018 | 1          | urine        | 1          | coloniza-<br>tion   | 34  | K   | 11 | 95             | 507788            | 5537205         | 57.30     | 258257 | 142128 | 8   | 16  | 0.00                 | 710,264       | 168,737,035 | 36          | 237.6       | 251         |
| ND33                                   | SAMN17-<br>168602           | Po-<br>land  | Gdansk        | 2018 | 3          | anal<br>swab | 0          | coloniza-<br>tion   | ND  | K   | 11 | 112            | 491481            | 5956422         | 56.82     | 248278 | 153777 | 9   | 16  | 0.00                 | 800,507       | 187,207,483 | 36          | 233.9       | 251         |
| ND34                                   | SAMN17-<br>168603           | Po-<br>land  | Gdansk        | 2018 | 3          | anal<br>swab | 1          | coloniza-<br>tion   | ND  | K   | 11 | 117            | 491539            | 5999106         | 56.73     | 258283 | 129570 | 9   | 17  | 0.00                 | 524,443       | 121,940,935 | 36          | 232.5       | 251         |

**Table S2. (EXCEL format).** Metadata for all additional bacterial isolates included in the study from PATRIC database and Izdebski et al. paper [32].**Table S3. (EXCEL format)** The matrix of the core genome SNPs differences determined against the reference genome from the same ST.**Table S4.** *K. pneumoniae* isolates included in this study from PATRIC database—basic epidemiological data and resistomes based on sequencing WGS.

| Isolates Name | Source | Year of isolation | Country | Host health | S T | Plasmid replicon profiles      | Acquired antimicrobial resistance genes <sup>a</sup> |                                                                                                                            |                                |                                                   |              |                           |               |               |
|---------------|--------|-------------------|---------|-------------|-----|--------------------------------|------------------------------------------------------|----------------------------------------------------------------------------------------------------------------------------|--------------------------------|---------------------------------------------------|--------------|---------------------------|---------------|---------------|
|               |        |                   |         |             |     |                                | β-lactams                                            | aminoglycosides <sup>b</sup>                                                                                               | fluoroquinolones <sup>b</sup>  | macrolide, lincosamide, streptogramin antibiotics | phenicols    | sulphonamides             | tetracycline  | trimethoprim  |
| KN2323        | urine  | 2011              | China   | ND          | 1   | ColRNAI, FII(pHN7A8), L, R     | blaKPC-2                                             | <i>aadA2</i>                                                                                                               | -                              | -                                                 | <i>catA2</i> | -                         | -             | -             |
| KN7016        | blood  | 2011              | China   | sepsis      | 1   | FIB(K), FII(K), I1-I(Gamma), R | blaCTX-M-55                                          | -                                                                                                                          | <i>qnrB4</i> ,<br><i>qnrS1</i> | <i>mph(A)</i>                                     | -            | <i>sul1</i>               | -             | -             |
| KN7018        | urine  | 2011              | China   | UTI         | 1   | ColRNAI, FII(pHN7A8), L, N, R  | blaKPC-2<br>blaCTX-M-65,<br>blaTEM-1                 | <i>aac(6′)-Ib-cr</i> ,<br><i>aadA16</i> ,<br><i>aadA2</i>                                                                  | <i>aac(6′)-Ib-cr</i>           | -                                                 | <i>catA2</i> | <i>sul1</i>               | <i>tet(A)</i> | <i>dfrA27</i> |
| KN21570       | urine  | 2012              | Germany | infection   | 1   | FIB(K), FII, FII(K), L, R      | blaCTX-M-15,<br>blaOXA-48                            | <i>aac(3)-IVa</i> ,<br><i>aph(3′′)-Ib</i> ,<br><i>aph(4)-Ia</i> ,<br><i>aph(6)-Id</i> ,<br><i>aadA16</i> ,<br><i>aadA2</i> | <i>qnrS1</i>                   | -                                                 | <i>catA2</i> | <i>sul1</i> , <i>sul3</i> | -             | <i>dfrA27</i> |

|             |       |      |                |           |        |                                      |                                          |                                                                             |                                        |               |                                |             |               |                                  |
|-------------|-------|------|----------------|-----------|--------|--------------------------------------|------------------------------------------|-----------------------------------------------------------------------------|----------------------------------------|---------------|--------------------------------|-------------|---------------|----------------------------------|
| KN2<br>0456 | urine | 2013 | Greece         | infection | 1<br>1 | Col440I, FIB(K),<br>FII(K), L, N     | blaCTX-M-15,<br>blaOXA-1,-48             | <i>aac(6')-Ib-cr</i> , <i>aac(3)-IIa</i> , <i>aph(3')-Ia</i> , <i>aadA2</i> | <i>aac(6')-Ib-cr</i>                   | <i>mph(A)</i> | -                              | <i>sul1</i> | -             | <i>dfrA12</i> ,<br><i>dfrA14</i> |
| KN2<br>1217 | urine | 2013 | Slovakia       | infection | 1<br>1 | FIA(HI1), FIB(K),<br>FII(K), R       | blaCTX-M-15,<br>blaOXA-1,-9,<br>blaTEM-1 | <i>aac(6')-Ib</i> ,<br><i>aac(3)-IIa</i> ,<br><i>aadA2</i>                  | <i>qnrB4</i>                           | -             | <i>catA1</i>                   | <i>sul1</i> | -             | <i>dfrA12</i> ,<br><i>dfrA14</i> |
| KN2<br>1224 | urine | 2013 | Czech Republic | infection | 1<br>1 | Col(pHAD28), C,<br>FIB(K), FII(K), R | blaCTX-M-15,<br>blaOXA-1,<br>blaTEM-1    | <i>aac(6')-Ib-cr</i> , <i>aac(3)-IIa</i> , <i>aph(6)-Id</i>                 | <i>aac(6')-Ib-cr</i>                   | -             | -                              | <i>sul1</i> | <i>tet(D)</i> | <i>dfrA22</i>                    |
| KN2<br>1306 | urine | 2013 | Estonia        | infection | 1<br>1 | FIB(K), FII(K)                       | blaCTX-M-15,<br>blaOXA-1,<br>blaTEM-1    | <i>aac(6')-Ib-cr</i> , <i>aac(3)-IIa</i> , <i>aadA2</i>                     | <i>aac(6')-Ib-cr</i>                   | -             | -                              | <i>sul1</i> | -             | -                                |
| KN2<br>1320 | urine | 2013 | Poland         | infection | 1<br>1 | FIB(K), FII(K),<br>FIA(HI1), R       | blaCTX-M-15,<br>blaOXA-1,-9,<br>blaTEM-1 | <i>aac(6')-Ib-cr</i> , <i>aac(3)-IIa</i> , <i>aadA2</i>                     | <i>aac(6')-Ib-cr</i> ,<br><i>qnrB4</i> | -             | <i>catA1</i>                   | <i>sul1</i> | -             | <i>dfrA12</i> ,<br><i>dfrA14</i> |
| KN2<br>1341 | urine | 2013 | Poland         | infection | 1<br>1 | FIB(K), FII(K),<br>FIA(HI1), R       | blaCTX-M-15,<br>blaOXA-1                 | <i>aac(6')-Ib-cr</i> , <i>aac(3)-IIa</i> , <i>aadA2</i>                     | <i>aac(6')-Ib-cr</i> ,<br><i>qnrB4</i> | -             | <i>catA1</i>                   | <i>sul1</i> | -             | <i>dfrA12</i> ,<br><i>dfrA14</i> |
| KN2<br>1352 | urine | 2013 | France         | infection | 1<br>1 | FIB(K), FII(K), R                    | blaOXA-1                                 | <i>aac(6')-Ib-cr</i> , <i>aph(3')-Ia</i> , <i>aadA2</i>                     | <i>aac(6')-Ib-cr</i>                   | <i>mph(A)</i> | <i>catA1</i> ,<br><i>catB3</i> | <i>sul1</i> | -             | <i>dfrA12</i>                    |
| KN2<br>1378 | urine | 2013 | Slovakia       | infection | 1<br>1 | FIB(K), FII(K),<br>FIA(HI1), R       | blaCTX-M-15,<br>blaOXA-1,-9,<br>blaTEM-1 | <i>aac(6')-Ib</i> ,<br><i>aac(3)-IIa</i>                                    | -                                      | -             | -                              | -           | -             | -                                |



|             |       |      |                           |                  |        |                                 |                                          |                                                                                                          |                                        |               |                                |             |               |                                  |
|-------------|-------|------|---------------------------|------------------|--------|---------------------------------|------------------------------------------|----------------------------------------------------------------------------------------------------------|----------------------------------------|---------------|--------------------------------|-------------|---------------|----------------------------------|
| KN2<br>1400 | urine | 2013 | Slova<br>kia              | coloniz<br>ation | 1<br>1 | FIB(K), FII(K), R               | blaCTX-M-15,<br>blaOXA-1,<br>blaTEM-1    | <i>aac(6')-Ib-cr</i> , <i>aac(3)-Ila</i> ,<br><i>aph(3'')-Ib</i> ,<br><i>aph(6)-Id</i> ,<br><i>aadA2</i> | <i>aac(6')-Ib-cr</i>                   | -             | <i>catA1</i>                   | <i>sul1</i> | -             | <i>dfrA12</i>                    |
| KN2<br>1403 | urine | 2013 | Slova<br>kia              | coloniz<br>ation | 1<br>1 | FIB(K), FII(K),<br>FIA(HII1), R | blaCTX-M-15,<br>blaOXA-1,-9,<br>blaTEM-1 | <i>aac(6')-Ib-cr</i> , <i>aac(3)-Ila</i> , <i>aadA2</i>                                                  | <i>aac(6')-Ib-cr</i> ,<br><i>qnrB4</i> | -             | <i>catA1</i>                   | <i>sul1</i> | -             | <i>dfrA12</i> ,<br><i>dfrA14</i> |
| KN2<br>1411 | urine | 2013 | Czec<br>h<br>Repu<br>blic | infectio<br>n    | 1<br>1 | Col440I, FIB(K)                 | blaCTX-M-15,<br>blaTEM-1                 | <i>aac(6')-Ib-cr</i> , <i>aac(3)-Ila</i>                                                                 | <i>aac(6')-Ib-cr</i>                   | -             | -                              | -           | <i>tet(D)</i> | -                                |
| KN2<br>1412 | urine | 2013 | Czec<br>h<br>Repu<br>blic | infectio<br>n    | 1<br>1 | FIB(K), R                       | blaCTX-M-15,<br>blaOXA-1                 | <i>aac(6')-Ib-cr</i> , <i>aac(3)-Ila</i> ,<br><i>aph(3'')-Ib</i> ,<br><i>aph(6)-Id</i> ,<br><i>aadA2</i> | <i>aac(6')-Ib-cr</i>                   | -             | <i>catA1</i>                   | <i>sul1</i> | -             | <i>dfrA12</i>                    |
| KN2<br>1420 | urine | 2013 | Czec<br>h<br>Repu<br>blic | infectio<br>n    | 1<br>1 | FIB(K), FII(K)                  | blaOXA-1                                 | <i>aac(6')-Ib-cr</i>                                                                                     | <i>aac(6')-Ib-cr</i> ,<br><i>qnrB4</i> | <i>mph(A)</i> | <i>catA1</i> ,<br><i>catB3</i> | <i>sul1</i> | -             | -                                |
| KN2<br>1445 | urine | 2013 | Eston<br>ia               | infectio<br>n    | 1<br>1 | FIB(K), FII(K), R               | blaOXA-1                                 | <i>aac(6')-Ib-cr</i> , <i>aph(3')-Ia</i> , <i>aadA2</i>                                                  | <i>aac(6')-Ib-cr</i> ,<br><i>qnrB4</i> | <i>mph(A)</i> | <i>catA1</i> ,<br><i>catB3</i> | <i>sul1</i> | -             | <i>dfrA12</i>                    |

|             |       |      |         |              |        |                                        |                                          |                                                                             |                                        |               |                                |                           |               |                                  |
|-------------|-------|------|---------|--------------|--------|----------------------------------------|------------------------------------------|-----------------------------------------------------------------------------|----------------------------------------|---------------|--------------------------------|---------------------------|---------------|----------------------------------|
| KN2<br>1447 | urine | 2013 | Poland  | infection    | 1<br>1 | FIA(HI1), R                            | blaCTX-M-15,<br>blaOXA-1,-9,<br>blaTEM-1 | <i>aac(6')-Ib</i> ,<br><i>aac(3)-IIa</i> ,<br><i>aadA2</i>                  | <i>qnrB4</i>                           | -             | <i>catA1</i>                   | <i>sul1</i>               | -             | <i>dfrA12</i> ,<br><i>dfrA14</i> |
| KN2<br>1466 | urine | 2013 | Estonia | colonization | 1<br>1 | FIB(K), FII(K), M1, R                  | blaCTX-M-15,<br>blaOXA-1,<br>blaTEM-1    | <i>aac(6')-Ib-cr</i> , <i>aadA2</i>                                         | <i>aac(6')-Ib-cr</i>                   | -             | <i>catA1</i> ,<br><i>catB3</i> | <i>sul1</i>               | -             | <i>dfrA12</i>                    |
| KN2<br>1507 | urine | 2013 | Malta   | colonization | 1<br>1 | Col440I, FIB(K), L, N                  | blaOXA-1,-48                             | <i>aac(6')-Ib-cr</i> , <i>aac(3)-IIa</i> , <i>aph(3')-Ia</i> , <i>aadA2</i> | <i>aac(6')-Ib-cr</i>                   | <i>mph(A)</i> | -                              | -                         | -             | <i>dfrA12</i> ,<br><i>dfrA14</i> |
| KN2<br>1511 | urine | 2013 | Malta   | infection    | 1<br>1 | Col440I, FIB(K), FII(K), L, N          | blaOXA-1,-48                             | <i>aac(6')-Ib-cr</i> , <i>aac(3)-IIa</i> , <i>aph(3')-Ia</i>                | <i>aac(6')-Ib-cr</i>                   | -             | -                              | -                         | -             | <i>dfrA14</i>                    |
| KN2<br>1932 | urine | 2013 | Italy   | infection    | 1<br>1 | Col(BS512), ColRNAI, FIB(K), FII(K), R | blaTEM-1                                 | <i>aac(3)-IVa</i> , <i>aph(4)-Ia</i> , <i>aadA2</i>                         | -                                      | -             | -                              | <i>sul3</i>               | <i>tet(A)</i> | -                                |
| KN2<br>1967 | urine | 2013 | Spain   | infection    | 1<br>1 | FIB(K), FII(K), R                      | blaCTX-M-15,<br>blaOXA-1,-48             | <i>aac(6')-Ib-cr</i> , <i>aac(3)-IIa</i> , <i>aph(3')-Ia</i> , <i>aadA2</i> | <i>aac(6')-Ib-cr</i> ,<br><i>qnrB1</i> | <i>mph(A)</i> | <i>catA1</i>                   | <i>sul1</i>               | -             | <i>dfrA12</i>                    |
| KN2<br>2010 | urine | 2013 | Hungary | infection    | 1<br>1 | FIA(HI1), FIB(K), FII(K), R            | blaCTX-M-15,<br>blaOXA-9,<br>blaTEM-1    | <i>aac(6')-Ib</i> ,<br><i>aac(3)-IIa</i> ,<br><i>aadA2</i>                  | <i>qnrB4</i>                           | -             | <i>catA1</i>                   | <i>sul1</i>               | -             | <i>dfrA12</i>                    |
| KN2<br>2370 | urine | 2013 | USA     | ND           | 1<br>1 | ColRNAI, FIB(K), FII(K)                | blaKPC-2, blaCTX-M-15,                   | <i>aph(3')-Ia</i> ,<br><i>aadA2</i>                                         | -                                      | <i>mph(A)</i> | -                              | <i>sul1</i> , <i>sul3</i> | -             | <i>dfrA12</i>                    |

|             |       |      |        |    |        |                                                 |                                                         |                                                                                                                                          |                      |               |              |                                    |                                  |               |
|-------------|-------|------|--------|----|--------|-------------------------------------------------|---------------------------------------------------------|------------------------------------------------------------------------------------------------------------------------------------------|----------------------|---------------|--------------|------------------------------------|----------------------------------|---------------|
|             |       |      |        |    |        |                                                 | blaOXA-9,<br>blaTEM-1                                   |                                                                                                                                          |                      |               |              |                                    |                                  |               |
| KN2<br>2384 | urine | 2013 | USA    | ND | 1<br>1 | ColRNAI, FIB(K),<br>FII(K), R                   | blaKPC-2,<br>blaCTX-M-15,<br>blaOXA-9,<br>blaTEM-1      | <i>aph(3')-Ia</i> ,<br><i>aadA2</i>                                                                                                      | -                    | <i>mph(A)</i> | -            | <i>sul1, sul3</i>                  | -                                | <i>dfrA12</i> |
| KN2<br>2431 | urine | 2013 | USA    | ND | 1<br>1 | ColRNAI, FIB(K),<br>FIB(pQil), FII(K), R,<br>X3 | blaKPC-2,<br>blaCTX-M-15,<br>blaOXA-9,<br>blaTEM-1      | <i>aac(3)-IVa</i> ,<br><i>aph(3')-Ia</i> ,<br><i>aph(4)-Ia</i> ,<br><i>aadA2</i>                                                         | -                    | <i>mph(A)</i> | <i>catA1</i> | <i>sul1, sul3</i>                  | -                                | <i>dfrA12</i> |
| KN2<br>2452 | urine | 2013 | USA    | ND | 1<br>1 | ColRNAI, FIB(K),<br>M1, R                       | blaOXA-2                                                | <i>ant(2'')-Ia</i>                                                                                                                       | -                    | -             | -            | <i>sul1</i>                        | -                                | -             |
| KN5<br>636  | stool | 2013 | Greece | ND | 1<br>1 | ColI440I, C, FIB(K),<br>FII(K), L               | blaCTX-M-15,<br>blaOXA-10,<br>blaOXA-1,-48,<br>blaTEM-1 | <i>aac(6')-Ib-cr</i> , <i>aac(3)-IIa</i> , <i>ant(2'')-Ia</i> , <i>aph(3'')-Ib</i> , <i>aph(3')-Ia</i> , <i>aph(6)-Id</i> , <i>aadA2</i> | <i>aac(6')-Ib-cr</i> | <i>mph(A)</i> | -            | <i>sul2</i>                        | <i>tet(A)</i> ,<br><i>tet(G)</i> | <i>dfrA12</i> |
| KN9<br>42   | urine | 2013 | USA    | ND | 1<br>1 | ColRNAI, FIB(K),<br>FII(K), R, X1               | blaKPC-2,<br>blaCTX-M-15,<br>blaOXA-9,<br>blaTEM-1      | <i>aph(3')-Ia</i> ,<br><i>aadA2</i>                                                                                                      | -                    | <i>mph(A)</i> | -            | <i>sul1, sul2</i> ,<br><i>sul3</i> | -                                | <i>dfrA12</i> |
| KN9<br>76   | urine | 2013 | USA    | ND | 1<br>1 | ColRNAI, FIB(K),<br>FII(K), R, X1               | blaKPC-2,<br>blaCTX-M-15,<br>blaOXA-9,<br>blaTEM-1      | <i>aph(3')-Ia</i> ,<br><i>aadA2</i>                                                                                                      | -                    | <i>mph(A)</i> | -            | <i>sul1, sul2</i> ,<br><i>sul3</i> | -                                | <i>dfrA12</i> |

|             |                                      |      |          |              |        |                                |                                     |                                                             |                                     |               |              |                   |               |                       |
|-------------|--------------------------------------|------|----------|--------------|--------|--------------------------------|-------------------------------------|-------------------------------------------------------------|-------------------------------------|---------------|--------------|-------------------|---------------|-----------------------|
| KN2<br>0499 | urine                                | 2014 | Spain    | infection    | 1<br>1 | FIB(K), N, R                   | blaTEM-1                            | <i>aac(6′)-Ib-cr, aadA16, aph(3′′)-Ib, aph(6)-Id, aadA2</i> | <i>aac(6′)-Ib-cr, qnrB19, qnrB6</i> | -             | -            | <i>sul1, sul3</i> | -             | <i>dfrA27</i>         |
| KN2<br>0569 | urine                                | 2014 | Portugal | ND           | 1<br>1 | ColRNAI, R, X1                 | blaCTX-M-1, blaOXA-1                | <i>aac(6′)-Ib-cr, aph(3′)-Ia</i>                            | <i>aac(6′)-Ib-cr, qnrB4</i>         | <i>mph(A)</i> | <i>catB3</i> | <i>sul1</i>       | -             | -                     |
| KN2<br>0662 | urine                                | 2014 | Portugal | ND           | 1<br>1 | R                              | blaOXA-1                            | <i>aac(6′)-Ib-cr, aph(3′)-Ia</i>                            | <i>aac(6′)-Ib-cr, qnrB4</i>         | <i>mph(A)</i> | <i>catB3</i> | <i>sul1</i>       | <i>tet(A)</i> | -                     |
| KN2<br>0804 | urine                                | 2014 | Romania  | infection    | 1<br>1 | R                              | blaOXA-1                            | <i>aac(6′)-Ib-cr, aadA2</i>                                 | <i>aac(6′)-Ib-cr, qnrB4</i>         | <i>mph(A)</i> | <i>catB3</i> | <i>sul1</i>       | <i>tet(A)</i> | -                     |
| KN2<br>1178 | urine                                | 2014 | Belgium  | ND           | 1<br>1 | FIB(K), FII(K), FIA(HI1), L, R | blaCTX-M-15, blaOXA-48,-9, blaTEM-1 | <i>aac(6′)-Ib, aac(3)-IIa, aadA2</i>                        | -                                   | -             | <i>catA1</i> | <i>sul1</i>       | -             | <i>dfrA12</i>         |
| KN2<br>1221 | urine                                | 2014 | Slovakia | infection    | 1<br>1 | ColRNAI, FIB(K), FII(K), R, C  | blaCTX-M-15, blaOXA-1, blaTEM-1     | <i>aac(6′)-Ib-cr, aac(3)-IIa, aph(3′′)-Ib, aph(6)-Id</i>    | <i>aac(6′)-Ib-cr</i>                | -             | <i>catA1</i> | <i>sul2</i>       | <i>tet(D)</i> | -                     |
| KN2<br>1316 | discharge from the lower respiratory | 2014 | Poland   | colonization | 1<br>1 | FIB(K), FII(K), FIA(HI1), R    | blaCTX-M-15, blaOXA-1,-9, blaTEM-1  | <i>aac(3)-IIa, aadA2</i>                                    | -                                   | -             | <i>catA1</i> | <i>sul1</i>       | -             | <i>dfrA12, dfrA14</i> |

| tury tract  |                                                                   |      |              |                  |        |                                         |                                          |                                                            |                                        |   |              |             |                         |
|-------------|-------------------------------------------------------------------|------|--------------|------------------|--------|-----------------------------------------|------------------------------------------|------------------------------------------------------------|----------------------------------------|---|--------------|-------------|-------------------------|
| KN2<br>1317 | urine                                                             | 2014 | Polan<br>d   | infectio<br>n    | 1<br>1 | FIB(K), FII(K),<br>FIA(HI1), R          | blaCTX-M-15,<br>blaOXA-1,-9,<br>blaTEM-1 | <i>aac(6')-Ib</i> ,<br><i>aac(3)-IIa</i> ,<br><i>aadA2</i> | -                                      | - | <i>catA1</i> | <i>sul1</i> | -<br>,<br><i>dfrA14</i> |
| KN2<br>1321 | urine                                                             | 2014 | Polan<br>d   | infectio<br>n    | 1<br>1 | FIB(K), FII(K),<br>FIA(HI1), R          | blaCTX-M-15,<br>blaOXA-1                 | <i>aac(6')-Ib-cr</i> , <i>aac(3)-IIa</i> , <i>aadA2</i>    | <i>aac(6')-Ib-cr</i> ,<br><i>qnrB4</i> | - | <i>catA1</i> | <i>sul1</i> | -<br>,<br><i>dfrA14</i> |
| KN2<br>1331 | discha<br>rge<br>from<br>the<br>lower<br>respira<br>tory<br>tract | 2014 | Polan<br>d   | infectio<br>n    | 1<br>1 | FIB(K), FII(K),<br>FIA(HI1), R          | blaCTX-M-15,<br>blaOXA-1                 | <i>aac(6')-Ib-cr</i> , <i>aac(3)-IIa</i> , <i>aadA2</i>    | <i>aac(6')-Ib-cr</i>                   | - | <i>catA1</i> | <i>sul1</i> | -<br>,<br><i>dfrA14</i> |
| KN2<br>1333 | urine                                                             | 2014 | Polan<br>d   | infectio<br>n    | 1<br>1 | FIB(K), FII(K),<br>FIA(HI1), R, M2      | blaCTX-M-15,<br>blaOXA-1,-9,<br>blaTEM-1 | <i>aac(6')-Ib</i> ,<br><i>aac(3)-IId</i> ,<br><i>aadA2</i> | <i>qnrB4</i>                           | - | <i>catA1</i> | <i>sul1</i> | -<br><i>dfrA12</i>      |
| KN2<br>1345 | urine                                                             | 2014 | Polan<br>d   | infectio<br>n    | 1<br>1 | FIB(K), FII(K),<br>FIA(HI1), R          | blaCTX-M-15,<br>blaOXA-1                 | <i>aac(6')-Ib-cr</i> , <i>aac(3)-IIa</i> , <i>aadA2</i>    | <i>aac(6')-Ib-cr</i> ,<br><i>qnrB4</i> | - | <i>catA1</i> | <i>sul1</i> | -<br><i>dfrA12</i>      |
| KN2<br>1376 | urine                                                             | 2014 | Slova<br>kia | coloniz<br>ation | 1<br>1 | FIB(K), FII(K), R                       | blaOXA-1                                 | <i>aac(6')-Ib-cr</i> , <i>aadA2</i>                        | <i>aac(6')-Ib-cr</i>                   | - | <i>catA1</i> | <i>sul1</i> | -<br><i>dfrA12</i>      |
| KN2<br>1384 | urine                                                             | 2014 | Slova<br>kia | coloniz<br>ation | 1<br>1 | Col440I, FIB(K),<br>FII(K), FIA(HI1), R | blaCTX-M-15,<br>blaOXA-1,-9,<br>blaTEM-1 | <i>aac(6')-Ib</i> ,<br><i>aac(3)-IIa</i> ,<br><i>aadA2</i> | <i>qnrB4</i>                           | - | <i>catA1</i> | <i>sul1</i> | -<br>,<br><i>dfrA14</i> |

|             |                                           |      |                           |                  |        |                                |                                          |                                                                                           |                                        |               |                                |             |               |                                  |
|-------------|-------------------------------------------|------|---------------------------|------------------|--------|--------------------------------|------------------------------------------|-------------------------------------------------------------------------------------------|----------------------------------------|---------------|--------------------------------|-------------|---------------|----------------------------------|
| KN2<br>1387 | urine                                     | 2014 | Slova<br>kia              | infectio<br>n    | 1<br>1 | FIB(K), FII(K), R              | blaCTX-M-15,<br>blaOXA-1,<br>blaTEM-1    | <i>aac(6')-Ib-cr</i> ,<br><i>aph(3'')-Ib</i> ,<br><i>aph(6)-Id</i>                        | <i>aac(6')-Ib-cr</i>                   | -             | -                              | <i>sul2</i> | <i>tet(D)</i> | -                                |
| KN2<br>1388 | urine                                     | 2014 | Slova<br>kia              | infectio<br>n    | 1<br>1 | FIB(K), FII(K), R              | blaCTX-M-15,<br>blaOXA-1,<br>blaTEM-1    | <i>aac(6')-Ib-cr</i> ,<br><i>aac(3)-IIa</i> ,<br><i>aph(3'')-Ib</i> ,<br><i>aph(6)-Id</i> | <i>aac(6')-Ib-cr</i>                   | -             | <i>catA1</i>                   | <i>sul2</i> | <i>tet(D)</i> | -                                |
| KN2<br>1391 | urine                                     | 2014 | Slova<br>kia              | coloniz<br>ation | 1<br>1 | FIB(K), FII(K),<br>FIA(HI1), R | blaCTX-M-15,<br>blaOXA-1,-9,<br>blaTEM-1 | <i>aac(6')-Ib</i> ,<br><i>aac(3)-IIa</i> ,<br><i>aadA2</i>                                | <i>qnrB4</i>                           | -             | <i>catA1</i>                   | <i>sul1</i> | -             | <i>dfrA12</i> ,<br><i>dfrA14</i> |
| KN2<br>1413 | urine                                     | 2014 | Franc<br>e                | coloniz<br>ation | 1<br>1 | FIB(K), FII, M2, R             | blaCTX-M-3,<br>blaOXA-1,<br>blaTEM-1     | <i>aac(6')-Ib-cr</i> ,<br><i>aph(3'')-Ib</i> ,<br><i>aph(3')-Ia</i> ,<br><i>aph(6)-Id</i> | <i>aac(6')-Ib-cr</i> ,<br><i>qnrB4</i> | -             | <i>catB3</i>                   | <i>sul1</i> | -             | -                                |
| KN2<br>1423 | urine                                     | 2014 | Czec<br>h<br>Repu<br>blic | infectio<br>n    | 1<br>1 | FIB(K), FII(K), R              | blaOXA-1                                 | <i>aac(6')-Ib-cr</i> ,<br><i>aph(3')-Ia</i>                                               | <i>aac(6')-Ib-cr</i> ,<br><i>qnrB4</i> | <i>mph(A)</i> | <i>catA1</i> ,<br><i>catB3</i> | <i>sul1</i> | -             | -                                |
| KN2<br>1458 | urine                                     | 2014 | Polan<br>d                | infectio<br>n    | 1<br>1 | FIB(K), FII(K)                 | -                                        | <i>aadA2</i>                                                                              | <i>qnrB4</i>                           | -             | <i>catA1</i>                   | <i>sul1</i> | -             | <i>dfrA12</i>                    |
| KN2<br>1556 | discha<br>rge<br>from<br>the<br>woun<br>d | 2014 | Germ<br>any               | coloniz<br>ation | 1<br>1 | FIB(K), FII(K), R              | blaOXA-1                                 | <i>aac(6')-Ib-cr</i> ,<br><i>aph(3')-Ia</i> ,<br><i>aadA2</i>                             | <i>aac(6')-Ib-cr</i> ,<br><i>qnrB4</i> | <i>mph(A)</i> | <i>catA1</i> ,<br><i>catB3</i> | <i>sul1</i> | -             | <i>dfrA12</i>                    |

|             |       |      |         |                          |        |                                                                     |                                                    |                                                                                        |                                                          |               |              |                   |               |               |
|-------------|-------|------|---------|--------------------------|--------|---------------------------------------------------------------------|----------------------------------------------------|----------------------------------------------------------------------------------------|----------------------------------------------------------|---------------|--------------|-------------------|---------------|---------------|
| KN2<br>2002 | urine | 2014 | Hungary | infection                | 1<br>1 | FIA(HI1), FIB(K),<br>FII(K), R                                      | blaCTX-M-15,<br>blaOXA-9,<br>blaTEM-1              | <i>aac(6')-Ib</i> ,<br><i>aac(3)-IIa</i> ,<br><i>aadA2</i>                             | <i>qnrB4</i>                                             | -             | <i>catA1</i> | <i>sul1</i>       | -             | <i>dfrA12</i> |
| KN2<br>2572 | blood | 2014 | China   | bloodstream<br>infection | 1<br>1 | ColRNAI,<br>FII(pHN7A8),<br>HI1B(pNDM-MAR),<br>I1-I(Gamma), R, repB | blaKPC-2,<br>blaCTX-M-<br>14b,blaTEM-1             | <i>aac(6')-Ib-cr</i> , <i>aadA16</i>                                                   | <i>aac(6')-Ib-cr</i>                                     | -             | <i>catA2</i> | <i>sul1</i>       | -             | <i>dfrA27</i> |
| KN2<br>4396 | urine | 2014 | USA     | ND                       | 1<br>1 | ColRNAI, pKPC-<br>CAV1193                                           | blaKPC-3,<br>blaTEM-1                              | <i>aadA2</i>                                                                           | <i>qnrS1</i>                                             | -             | -            | <i>sul1</i>       | -             | -             |
| KN1<br>002  | urine | 2014 | USA     | ND                       | 1<br>1 | ColRNAI, FIB(K),<br>FIB(pQil), R                                    | blaKPC-2,<br>blaCTX-M-15,<br>blaOXA-9,<br>blaTEM-1 | <i>aph(3')-Ia</i> ,<br><i>aadA2</i>                                                    | -                                                        | <i>mph(A)</i> | -            | <i>sul1, sul3</i> | -             | <i>dfrA12</i> |
| KN1<br>2786 | urine | 2015 | Nigeria | ND                       | 1<br>1 | ColKP3, FIB(K),<br>FIB(pNDM-Mar),<br>FII(K), R, X3                  | blaCTX-M-15,<br>blaOXA-1,-181,<br>blaTEM-1         | <i>aac(6')-Ib-cr</i> , <i>aac(3)-IIa</i> ,<br><i>aph(3'')-Ib</i> ,<br><i>aph(6)-Id</i> | <i>aac(6')-Ib-cr</i> ,<br><i>qnrB2</i> ,<br><i>qnrS1</i> | <i>mph(A)</i> | <i>catA1</i> | <i>sul1</i>       | <i>tet(A)</i> | <i>dfrA15</i> |
| KN1<br>9860 | blood | 2015 | Brazil  | infection                | 1<br>1 | ColRNAI, FIB(K),<br>FII(K), N                                       | blaKPC-2,<br>blaCTX-M-2,<br>blaOXA-2,<br>blaTEM-1  | <i>aac(3)-IIa</i> ,<br><i>aadA2</i>                                                    | -                                                        | -             | <i>catA1</i> | <i>sul1</i>       | -             | <i>dfrA12</i> |
| KN1<br>9872 | stool | 2015 | China   | ND                       | 1<br>1 | FIB(K), FIB(pKPHS1),<br>FII(pHN7A8), R                              | blaKPC-2,<br>blaCTX-M-14<br>blaTEM-1               | -                                                                                      | <i>qnrS1</i>                                             | -             | -            | <i>sul1</i>       | <i>tet(A)</i> | <i>dfrA1</i>  |
| KN2<br>2569 | blood | 2015 | China   | bloodstream              | 1<br>1 | ColRNAI,<br>FII(pHN7A8),                                            | blaKPC-2,<br>blaCTX-M-147                          | <i>aadA2</i>                                                                           | -                                                        | -             | -            | -                 | -             | -             |

|             |                                   |      |          |                                  |        |                                                     |                                                    |                                                                     |                                 |               |                         |                   |               |                           |
|-------------|-----------------------------------|------|----------|----------------------------------|--------|-----------------------------------------------------|----------------------------------------------------|---------------------------------------------------------------------|---------------------------------|---------------|-------------------------|-------------------|---------------|---------------------------|
|             |                                   |      |          | infectio<br>n                    |        | HI1B(pNDM-MAR),<br>R, repB                          |                                                    |                                                                     |                                 |               |                         |                   |               |                           |
| KN2<br>2570 | blood                             | 2015 | China    | bloodst<br>ream<br>infectio<br>n | 1<br>1 | ColRNAI,<br>FII(pHN7A8),<br>HI1B(pNDM-MAR),<br>repB | blaKPC-2,<br>blaCTX-M-65,<br>blaTEM-1              | <i>aadA2</i>                                                        | -                               | -             | -                       | -                 | -             | -                         |
| KN5<br>794  | urine                             | 2015 | Thailand | ND                               | 1<br>1 | Col8282, FIB(K),<br>FII(K), I1-I(Gamma),<br>R       | blaCTX-M-15,<br>blaOXA-1,<br>blaTEM-1              | <i>aac(6')-Ib-<br/>cr, aac(3)-<br/>IId, aph(3')-<br/>Ia, aadA17</i> | <i>aac(6')-Ib-cr,<br/>qnrB4</i> | <i>mph(A)</i> | <i>catA1,<br/>catB3</i> | <i>sul1</i>       | -             | <i>dfrA12</i>             |
| KN9<br>35   | discharge<br>from<br>the<br>wound | 2015 | USA      | ND                               | 1<br>1 | FIA(HI1), FIB(K),<br>FII(K), M1, R                  | blaCTX-M-15,<br>blaOXA-1                           | <i>aac(6')-Ib-<br/>cr, aac(3)-<br/>IIa, ant(2'')-<br/>Ia, aadA2</i> | <i>aac(6')-Ib-cr,<br/>qnrS1</i> | -             | -                       | <i>sul1</i>       | <i>tet(A)</i> | <i>dfrA12,<br/>dfrA14</i> |
| KN9<br>43   | urine                             | 2015 | USA      | ND                               | 1<br>1 | ColRNAI, FIB(K),<br>FII(K), R                       | blaKPC-2,<br>blaCTX-M-15,<br>blaOXA-9,<br>blaTEM-1 | <i>aph(3')-Ia,<br/>aadA2</i>                                        | -                               | <i>mph(A)</i> | -                       | <i>sul1, sul3</i> | -             | <i>dfrA12</i>             |
| KN9<br>71   | discharge<br>from<br>the<br>wound | 2015 | USA      | ND                               | 1<br>1 | ColRNAI, FIB(K),<br>FII(K), R                       | blaKPC-2,<br>blaCTX-M-15,<br>blaOXA-9,<br>blaTEM-1 | <i>aph(3')-Ia,<br/>aadA2</i>                                        | -                               | <i>mph(A)</i> | -                       | <i>sul1, sul3</i> | -             | <i>dfrA12</i>             |



|             |       |      |        |                              |             |                                                           |                                         |                                          |              |                                  |              |                   |               |               |
|-------------|-------|------|--------|------------------------------|-------------|-----------------------------------------------------------|-----------------------------------------|------------------------------------------|--------------|----------------------------------|--------------|-------------------|---------------|---------------|
| KN1<br>9874 | stool | 2016 | China  | ND                           | 1<br>1      | FIB(K), FIB(pKPHS1),<br>FII(pHN7A8), R                    | blaKPC-2,<br>blaCTX-M-65<br>blaTEM-1    | -                                        | <i>qnrS1</i> | -                                | -            | <i>sul1</i>       | <i>tet(A)</i> | <i>dfrA1</i>  |
| KN7<br>212  | urine | 2016 | India  | bloodst<br>ream<br>infection | 1<br>1      | ColKP3, FIB(pQil),<br>FII(K), HI1B(pNDM-<br>MAR), R, repB | blaCTX-M-15,<br>blaOXA-232,<br>blaTEM-1 | <i>aph(3'')-Ib</i> ,<br><i>aph(6)-Id</i> | <i>qnrB1</i> | -                                | -            | <i>sul2</i>       | -             | -             |
| KN7<br>213  | blood | 2016 | India  | bloodst<br>ream<br>infection | 1<br>1      | ColKP3, FIB(pQil),<br>FII(K), HI1B(pNDM-<br>MAR), R, repB | blaCTX-M-15,<br>blaOXA-232,<br>blaTEM-1 | <i>aph(3'')-Ib</i> ,<br><i>aph(6)-Id</i> | <i>qnrB1</i> | -                                | -            | <i>sul2</i>       | -             | -             |
| KN1<br>8517 | urine | 2017 | USA    | infection                    | 1<br>1      | C                                                         | -                                       | -                                        | -            | -                                | -            | <i>sul2</i>       | -             | -             |
| KN1<br>8530 | blood | 2017 | USA    | infection                    | 1<br>1      | C, R                                                      | blaOXA-10                               | <i>aadA2</i>                             | -            | -                                | -            | <i>sul1, sul2</i> | <i>tet(D)</i> | <i>dfrA14</i> |
| KN1<br>8689 | stool | 2017 | China  | ND                           | 1<br>1      | ColRNAI,<br>FII(pHN7A8), HI1B(p<br>NDM-MAR), R, repB      | blaKPC-2,<br>blaCTX-M-65,<br>blaTEM-1   | <i>aadA2</i>                             | <i>qnrS1</i> | -                                | <i>catA2</i> | <i>sul2</i>       | <i>tet(A)</i> | <i>dfrA14</i> |
| KN1<br>8694 | stool | 2017 | China  | ND                           | 1<br>1      | ColRNAI,<br>FII(pHN7A8), N, R,<br>repB                    | blaKPC-2,<br>blaCTX-M-3,<br>blaTEM-1    | <i>aadA2</i> ,<br><i>armA</i>            | -            | <i>mph(E)</i> ,<br><i>msr(E)</i> | <i>catB8</i> | -                 | -             | <i>dfrA12</i> |
| KN1<br>9873 | stool | 2017 | China  | ND                           | 1<br>1      | FIB(K), FIB(pKPHS1),<br>FII(pHN7A8), R                    | blaKPC-2,<br>blaCTX-M-90<br>blaTEM-1    | -                                        | <i>qnrS1</i> | -                                | -            | <i>sul1</i>       | <i>tet(A)</i> | <i>dfrA1</i>  |
| KN1<br>950  | urine | 2010 | Norway | ND                           | 2<br>5<br>8 | ColRNAI, FIB(K),<br>FII(K), FII(Yp),<br>I2(Delta)         | blaKPC-3,<br>blaOXA-9                   | <i>aph(3')-Ia</i> ,<br><i>aadA2</i>      | -            | <i>mph(A)</i>                    | <i>catA1</i> | <i>sul1</i>       | -             | <i>dfrA12</i> |

|                   |       |      |           |     |             |                                                 |                           |                                                                                                                                  |   |               |              |                   |                                  |                                                               |
|-------------------|-------|------|-----------|-----|-------------|-------------------------------------------------|---------------------------|----------------------------------------------------------------------------------------------------------------------------------|---|---------------|--------------|-------------------|----------------------------------|---------------------------------------------------------------|
| KN1<br>3284<br>23 | urine | 2012 | USA       | ND  | 2<br>5<br>8 | ColRNAI, FIB(K),<br>FII(K), R, X3               | blaKPC-2,                 | <i>aac(6')-Ib</i> ,<br><i>aac(3)-IVa</i> ,<br><i>aph(4)-Ia</i> ,<br><i>aadA2</i>                                                 | - | <i>mph(A)</i> | <i>catA1</i> | <i>sul1, sul3</i> | -                                | <i>dfrA12</i>                                                 |
| KN5<br>647        | urine | 2012 | Greece    | ND  | 2<br>5<br>8 | ColRNAI, FIB(K),<br>FIB(pQil), FII(K), C,<br>X3 | blaKPC-2,<br>blaOXA-10,-9 | <i>aac(6')-Ib</i> ,<br><i>ant(2'')-Ia</i> ,<br><i>aph(3'')-Ib</i> ,<br><i>aph(3')-Ia</i> ,<br><i>aph(6)-Id</i> ,<br><i>aadA2</i> | - | <i>mph(A)</i> | <i>catA1</i> | <i>sul2</i>       | <i>tet(A)</i> ,<br><i>tet(G)</i> | <i>dfrA12</i> ,<br>,<br><i>dfrA14</i> ,<br>,<br><i>dfrA23</i> |
| KN1<br>3096       | urine | 2013 | USA       | ND  | 2<br>5<br>8 | ColRNAI, FIB(K),<br>FIB(pQil), FII(K)           | blaKPC-2,<br>blaOXA-9     | <i>aac(6')-Ib</i> ,<br><i>aph(3')-Ia</i> ,<br><i>aadA2</i>                                                                       | - | <i>mph(A)</i> | <i>catA1</i> | <i>sul1</i>       | -                                | <i>dfrA12</i>                                                 |
| KN1<br>4299       | urine | 2013 | USA       | ND  | 2<br>5<br>8 | ColRNAI, X3                                     | blaTEM-1                  | <i>aac(6')-Ib</i>                                                                                                                | - | -             | -            | -                 | -                                | -                                                             |
| KN1<br>4368       | urine | 2013 | USA       | ND  | 2<br>5<br>8 | ColRNAI, FIB(K),<br>FIB(pQil), FII(K), X3       | blaKPC-2,<br>blaOXA-9     | <i>aac(6')-Ib</i> ,<br><i>aph(3')-Ia</i>                                                                                         | - | <i>mph(A)</i> | <i>catA1</i> | <i>sul1</i>       | -                                | <i>dfrA12</i>                                                 |
| KN1<br>757        | urine | 2014 | Australia | UTI | 2<br>5<br>8 | ColRNAI, FIB(K),<br>FII(K), FIB(pQil), X3       | blaKPC-2,<br>blaOXA-9     | <i>aac(6')-Ib</i> ,<br><i>aph(3')-Ia</i> ,<br><i>aadA2</i>                                                                       | - | <i>mph(A)</i> | <i>catA1</i> | <i>sul1</i>       | -                                | <i>dfrA12</i>                                                 |
| KN5<br>623        | stool | 2014 | Greece    | ND  | 2<br>5<br>8 | ColRNAI, FIB(K),<br>FII(K), M1, X3              | blaKPC-2,                 | <i>aac(6')-Ib</i> ,<br><i>aph(3')-Ia</i> ,<br><i>aadA2</i>                                                                       | - | <i>mph(A)</i> | -            | <i>sul1</i>       | -                                | <i>dfrA12</i>                                                 |

|                   |       |    |     |    |             |                                          |                                    |                                                            |   |               |              |                   |   |                                  |
|-------------------|-------|----|-----|----|-------------|------------------------------------------|------------------------------------|------------------------------------------------------------|---|---------------|--------------|-------------------|---|----------------------------------|
| KN1<br>4001<br>78 | urine | ND | USA | ND | 2<br>5<br>8 | ColRNAI, FIB(K),<br>FII(K), FII(Yp), X3  | blaKPC-3,<br>blaOXA-9,<br>blaTEM-1 | <i>aph(3'')-Ib</i> ,<br><i>aph(6)-Id</i> ,<br><i>aadA2</i> | - | <i>mph(A)</i> | <i>catA1</i> | <i>sul1, sul2</i> | - | <i>dfrA12</i> ,<br><i>dfrA14</i> |
| KN1<br>4001<br>80 | urine | ND | USA | ND | 2<br>5<br>8 | ColRNAI,<br>FIA(pBK30683),<br>FIB(K), X3 | blaKPC-3,<br>blaOXA-9              | <i>aph(3'')-Ib</i> ,<br><i>aph(6)-Id</i>                   | - | <i>mph(A)</i> | -            | <i>sul2</i>       | - | <i>dfrA14</i>                    |
| KN1<br>4001<br>82 | urine | ND | USA | ND | 2<br>5<br>8 | FIA(pBK30683),<br>FIB(K), X3             | blaKPC-3,                          | <i>aph(3')-Ia</i>                                          | - | <i>mph(A)</i> | -            | -                 | - | <i>dfrA14</i>                    |

<sup>a</sup>Only acquired resistance genes are shown, as identified by ResFinder 3.1 [34]. <sup>b</sup>The *aac(6')-Ib-cr* gene shown in the 'aminoglycosides' and 'fluoroquinolones' columns is the same gene, conferring resistance to both classes of antimicrobials.

**Table S5.** Occurrence of integrative conjugation elements (ICEKp1 and ICEKp2) in clinical isolates of *K. pneumoniae* sequenced in this study and from PATRIC database and from Izdebski et al. paper [32]. (0 – absence, 1 - presence).

[illegible]

|              |   |   |   |   |   |   |   |   |   |   |   |   |   |   |
|--------------|---|---|---|---|---|---|---|---|---|---|---|---|---|---|
|              |   |   |   |   |   |   |   |   |   |   |   |   |   |   |
| KN20454 ST11 | 0 | 0 | 1 | 1 | 1 | 1 | 1 | 1 | 1 | 1 | 1 | 1 | 1 | 1 |
| KN20456 ST11 | 0 | 0 | 1 | 1 | 1 | 1 | 1 | 1 | 1 | 1 | 1 | 1 | 1 | 1 |
| KN20470 ST11 | 0 | 0 | 1 | 1 | 1 | 1 | 1 | 1 | 1 | 1 | 1 | 1 | 1 | 1 |
| KN20499 ST11 | 0 | 0 | 0 | 0 | 0 | 0 | 0 | 1 | 1 | 1 | 1 | 1 | 1 | 1 |
| KN20531 ST11 | 0 | 0 | 1 | 1 | 1 | 1 | 1 | 1 | 1 | 1 | 1 | 1 | 1 | 1 |
| KN20534 ST11 | 0 | 0 | 1 | 1 | 1 | 1 | 1 | 1 | 1 | 1 | 1 | 1 | 1 | 1 |
| KN20537 ST11 | 0 | 0 | 1 | 1 | 1 | 1 | 1 | 1 | 1 | 1 | 1 | 1 | 1 | 1 |
| KN20569 ST11 | 0 | 0 | 0 | 0 | 0 | 0 | 0 | 1 | 1 | 1 | 1 | 1 | 1 | 1 |
| KN20607 ST11 | 0 | 0 | 1 | 1 | 1 | 1 | 1 | 1 | 1 | 1 | 1 | 1 | 1 | 1 |
| KN20611 ST11 | 0 | 0 | 1 | 1 | 1 | 1 | 1 | 1 | 1 | 1 | 1 | 1 | 1 | 1 |
| KN20617 ST11 | 0 | 0 | 1 | 1 | 1 | 1 | 1 | 1 | 1 | 1 | 1 | 1 | 1 | 1 |
| KN20662 ST11 | 0 | 0 | 1 | 1 | 1 | 1 | 1 | 1 | 1 | 1 | 1 | 1 | 1 | 1 |
| KN20779 ST11 | 0 | 0 | 1 | 1 | 1 | 1 | 1 | 1 | 1 | 1 | 1 | 1 | 1 | 1 |
| KN20804 ST11 | 0 | 0 | 1 | 1 | 1 | 1 | 1 | 1 | 1 | 1 | 1 | 1 | 1 | 1 |
| KN21178 ST11 | 0 | 0 | 1 | 1 | 1 | 1 | 1 | 1 | 1 | 1 | 1 | 1 | 1 | 1 |
| KN21217 ST11 | 0 | 0 | 1 | 1 | 1 | 1 | 1 | 1 | 1 | 1 | 1 | 1 | 1 | 1 |
| KN21221 ST11 | 0 | 0 | 0 | 0 | 0 | 0 | 0 | 1 | 1 | 1 | 1 | 1 | 1 | 1 |
| KN21224 ST11 | 0 | 0 | 0 | 0 | 0 | 0 | 0 | 1 | 1 | 1 | 1 | 1 | 1 | 1 |
| KN21238 ST11 | 0 | 0 | 1 | 1 | 1 | 1 | 1 | 1 | 1 | 1 | 1 | 1 | 1 | 1 |
| KN21306 ST11 | 0 | 0 | 1 | 1 | 1 | 1 | 1 | 1 | 1 | 1 | 1 | 1 | 1 | 1 |
| KN21316 ST11 | 0 | 0 | 1 | 1 | 1 | 1 | 1 | 1 | 1 | 1 | 1 | 1 | 1 | 1 |
| KN21317 ST11 | 0 | 0 | 1 | 1 | 1 | 1 | 1 | 1 | 1 | 1 | 1 | 1 | 1 | 1 |
| KN21320 ST11 | 0 | 0 | 1 | 1 | 1 | 1 | 0 | 1 | 1 | 1 | 1 | 1 | 1 | 1 |
| KN21321 ST11 | 0 | 0 | 1 | 1 | 1 | 1 | 1 | 1 | 1 | 1 | 1 | 1 | 1 | 1 |
| KN21331 ST11 | 0 | 0 | 1 | 1 | 1 | 1 | 1 | 1 | 1 | 1 | 1 | 1 | 1 | 1 |
| KN21333 ST11 | 0 | 0 | 1 | 1 | 1 | 1 | 1 | 1 | 1 | 1 | 1 | 1 | 1 | 1 |
| KN21341 ST11 | 0 | 0 | 1 | 1 | 1 | 1 | 1 | 1 | 1 | 1 | 1 | 1 | 1 | 1 |
| KN21345 ST11 | 0 | 0 | 1 | 1 | 1 | 1 | 1 | 1 | 1 | 1 | 1 | 1 | 1 | 1 |
| KN21352 ST11 | 0 | 0 | 0 | 0 | 0 | 0 | 0 | 1 | 1 | 1 | 1 | 1 | 1 | 1 |
| KN21376 ST11 | 0 | 0 | 0 | 0 | 0 | 0 | 0 | 1 | 1 | 1 | 1 | 1 | 1 | 1 |
| KN21378 ST11 | 0 | 0 | 1 | 1 | 1 | 1 | 1 | 1 | 1 | 1 | 1 | 1 | 1 | 1 |
| KN21384 ST11 | 0 | 0 | 1 | 1 | 1 | 1 | 1 | 1 | 1 | 1 | 1 | 1 | 1 | 1 |
| KN21387 ST11 | 0 | 0 | 0 | 0 | 0 | 0 | 0 | 1 | 1 | 1 | 1 | 1 | 1 | 1 |
| KN21388 ST11 | 0 | 0 | 0 | 0 | 0 | 0 | 0 | 1 | 1 | 1 | 1 | 1 | 1 | 1 |
| KN21391 ST11 | 0 | 0 | 1 | 1 | 1 | 1 | 1 | 1 | 1 | 1 | 1 | 1 | 1 | 1 |
| KN21400 ST11 | 0 | 0 | 0 | 0 | 0 | 0 | 0 | 1 | 1 | 1 | 1 | 1 | 1 | 1 |
| KN21403 ST11 | 0 | 0 | 1 | 1 | 1 | 1 | 1 | 1 | 1 | 1 | 1 | 1 | 1 | 1 |
| KN21411 ST11 | 0 | 0 | 0 | 0 | 0 | 0 | 0 | 1 | 1 | 1 | 1 | 1 | 1 | 1 |
| KN21412 ST11 | 0 | 0 | 0 | 0 | 0 | 0 | 0 | 1 | 1 | 1 | 1 | 1 | 1 | 1 |
| KN21413 ST11 | 0 | 0 | 0 | 0 | 0 | 0 | 0 | 1 | 1 | 1 | 1 | 1 | 1 | 1 |
| KN21420 ST11 | 0 | 0 | 0 | 0 | 0 | 0 | 0 | 1 | 1 | 1 | 1 | 1 | 1 | 1 |
| KN21423 ST11 | 0 | 0 | 0 | 0 | 0 | 0 | 0 | 1 | 1 | 1 | 1 | 1 | 1 | 1 |

[illegible]

[illegible]

[illegible]



**Table S6.** *K. pneumoniae* isolates (non NDM-1) from PATRIC database included in the study – serotypes data and virulomes (0 – absence, 1 - presence)

[illegible]

|         |    |   |   |   |   |   |   |   |   |   |   |   |
|---------|----|---|---|---|---|---|---|---|---|---|---|---|
| KN21221 | 11 | 1 | 1 | 1 | 0 | 0 | 0 | 1 | 1 | 1 | 1 | 1 |
| KN21224 | 11 | 1 | 1 | 1 | 0 | 0 | 0 | 1 | 1 | 1 | 1 | 1 |
| KN21306 | 11 | 1 | 1 | 1 | 1 | 1 | 1 | 1 | 1 | 1 | 1 | 1 |
| KN21316 | 11 | 1 | 1 | 1 | 1 | 1 | 1 | 1 | 1 | 1 | 1 | 1 |
| KN21317 | 11 | 1 | 1 | 1 | 1 | 1 | 1 | 1 | 1 | 1 | 1 | 1 |
| KN21320 | 11 | 1 | 1 | 1 | 1 | 1 | 1 | 1 | 1 | 1 | 1 | 1 |
| KN21321 | 11 | 1 | 1 | 1 | 1 | 1 | 1 | 1 | 1 | 1 | 1 | 1 |
| KN21331 | 11 | 1 | 1 | 1 | 1 | 1 | 1 | 1 | 1 | 1 | 1 | 1 |
| KN21333 | 11 | 1 | 1 | 1 | 1 | 1 | 1 | 1 | 1 | 1 | 1 | 1 |
| KN21341 | 11 | 1 | 1 | 1 | 1 | 1 | 1 | 1 | 1 | 1 | 1 | 1 |
| KN21345 | 11 | 1 | 1 | 1 | 1 | 1 | 1 | 1 | 1 | 1 | 1 | 1 |
| KN21352 | 11 | 1 | 1 | 1 | 0 | 0 | 0 | 1 | 1 | 1 | 1 | 1 |
| KN21376 | 11 | 1 | 1 | 1 | 0 | 0 | 0 | 1 | 1 | 1 | 1 | 1 |
| KN21378 | 11 | 1 | 1 | 1 | 1 | 1 | 1 | 1 | 1 | 1 | 1 | 1 |
| KN21384 | 11 | 1 | 1 | 1 | 1 | 1 | 1 | 1 | 1 | 1 | 1 | 1 |
| KN21387 | 11 | 1 | 1 | 1 | 0 | 0 | 0 | 1 | 1 | 1 | 1 | 1 |
| KN21388 | 11 | 1 | 1 | 1 | 0 | 0 | 0 | 1 | 1 | 1 | 1 | 1 |
| KN21391 | 11 | 1 | 1 | 1 | 1 | 1 | 1 | 1 | 1 | 1 | 1 | 1 |
| KN21400 | 11 | 1 | 1 | 1 | 0 | 0 | 0 | 1 | 1 | 1 | 1 | 1 |
| KN21403 | 11 | 1 | 1 | 1 | 1 | 1 | 1 | 1 | 1 | 1 | 1 | 1 |
| KN21411 | 11 | 1 | 1 | 1 | 0 | 0 | 0 | 1 | 1 | 1 | 1 | 1 |
| KN21412 | 11 | 1 | 1 | 1 | 0 | 0 | 0 | 1 | 1 | 1 | 1 | 1 |
| KN21413 | 11 | 1 | 1 | 1 | 0 | 0 | 0 | 1 | 1 | 1 | 1 | 1 |
| KN21420 | 11 | 1 | 1 | 1 | 0 | 0 | 0 | 1 | 1 | 1 | 1 | 1 |
| KN21423 | 11 | 1 | 1 | 1 | 0 | 0 | 0 | 1 | 1 | 1 | 1 | 1 |
| KN21445 | 11 | 1 | 1 | 1 | 1 | 1 | 1 | 1 | 1 | 1 | 1 | 1 |
| KN21447 | 11 | 1 | 1 | 1 | 1 | 1 | 1 | 1 | 1 | 1 | 1 | 1 |
| KN21458 | 11 | 1 | 1 | 0 | 0 | 0 | 0 | 1 | 1 | 1 | 1 | 1 |
| KN21466 | 11 | 1 | 1 | 1 | 1 | 1 | 1 | 1 | 1 | 1 | 1 | 1 |
| KN21507 | 11 | 1 | 1 | 1 | 1 | 1 | 1 | 1 | 1 | 1 | 1 | 1 |
| KN21511 | 11 | 1 | 1 | 1 | 1 | 1 | 1 | 1 | 1 | 1 | 1 | 1 |
| KN21556 | 11 | 1 | 1 | 1 | 1 | 1 | 1 | 1 | 1 | 1 | 1 | 1 |
| KN21570 | 11 | 1 | 1 | 1 | 0 | 0 | 0 | 1 | 1 | 1 | 1 | 1 |
| KN21932 | 11 | 1 | 1 | 1 | 0 | 0 | 0 | 1 | 1 | 1 | 1 | 1 |
| KN21967 | 11 | 1 | 1 | 0 | 1 | 1 | 1 | 1 | 1 | 1 | 1 | 1 |
